# Supplementary material for: Color tunable luminescence in ThO2:Er3+,Yb3+ nanocrystals: a promising new platform for upconversion
Source: Royal Society of Chemistry journal article supplement (doi:10.1039/d4cp00199k), 2024-01-01
Supplement: d4cp00199k1.pdf [file d4cp00199k1.pdf]

## Supplementary Information File

### **Color Tunable Luminescence in ThO<sub>2</sub>: Er<sup>3+</sup>, Yb<sup>3+</sup> Nanocrystals: A Promising New Platform for Upconversion**

Debarati Das<sup>1,2</sup>, Santosh K. Gupta<sup>1,2\*</sup>, Reshmi T. Parayil<sup>1,2</sup>, B. Modak<sup>2,3</sup>, and K. Sudarshan<sup>1,2,#</sup>

<sup>1</sup>Radiochemistry Division, Bhabha Atomic Research Centre, Mumbai – 400085, India

<sup>2</sup>Homi Bhabha National Institute, Anushaktinagar, Mumbai-400094, India

<sup>3</sup>Chemistry Division, Bhabha Atomic Research Centre, Mumbai – 400085, India

Corresponding Author Email: [\\*santoshg@barc.gov.in](mailto:*santoshg@barc.gov.in), [#kathis@barc.gov.in](mailto:#kathis@barc.gov.in)

#### ***S1. Computational Details***

Density functional theory (DFT) calculations with spin polarized condition have been carried out with Vienna ab initio simulation package (VASP) with projector augmented wave (PAW) pseudo potentials.<sup>1,2</sup> Perdew-Burke-Ernzerhof (PBE) functional under generalized gradient approximation (GGA) has been considered during geometry optimization processes by relaxing ionic positions, cell parameter, and cell volume.<sup>3</sup> Electronic structure calculations were carried out with the optimized geometries. An energy cut off value of 500 eV has been chosen with self-consistent energy convergence criteria of 10<sup>-6</sup>eV. Monkhorst and Pack scheme has been employed for sampling of Brillouin zone using  $\Gamma$ -centered k-point mesh value of 16 × 16 × 16.<sup>4</sup> We have employed hybrid DFT functional of the type Heyd, Scuseria, and Ernzerhof (HSE) for electronic structure calculations for more accurate calculation of the band gap,<sup>5</sup> and the corresponding exchange-correlation energy ( $E_{XC}^{HSE}$ ) is expressed as

$$E_{XC}^{HSE} = \alpha E_X^{SR}(\mu) + (1 - \alpha) E_X^{PBE, SR}(\mu) + E_X^{PBE, LR}(\mu) + E_C^{PBE} \quad (1)$$

where, SR and LR indicate the electron-electron interaction energy at short-range and long-range, respectively. ' $\alpha$ ' and ' $\mu$ ' are the mixing coefficient (20 % of mixing exact exchange) and screening parameter (0.2 Å<sup>-1</sup>), respectively. For phonon calculations of ThO<sub>2</sub>, the finite displacement method was chosen as implemented in the PHONOPY program.<sup>6</sup> In this method, first, perturbed cells containing 96 atoms (2 × 2 × 2 supercell) were created by displacing atoms from their equilibrium positions. Then, the forces acting on the displaced atoms were calculated using a k-point mesh of 7 × 7 × 7 within GGA. The force constant matrix was generated from the obtained force set and used to calculate the phonon dispersion plot.

## S2. Crystallite size from powder X-ray diffraction

From powder X-ray diffraction patterns, the crystallite sizes ( $d$ ) were calculated using Debye Scherrer equation:

$$d = \frac{k\lambda}{\sqrt{(B_S^2 - B_M^2)\cos\theta}} \quad (2)$$

Here  $k$  is the Scherrer constant (0.9),  $\lambda$  is the wavelength of Cu-K $\alpha$  line (1.5406 Å), and  $\theta$  is the angle corresponding to the Bragg reflection used for calculating the FWHM.  $B_S$  and  $B_M$  are the FWHM value (in radian) of the selected diffraction peaks of sample and reference (LaB<sub>6</sub>). The FWHM has been calculated by fitting the curve to a Gaussian function. The instrumental broadening has been considered by subtracting the contribution from the standard LaB<sub>6</sub>.

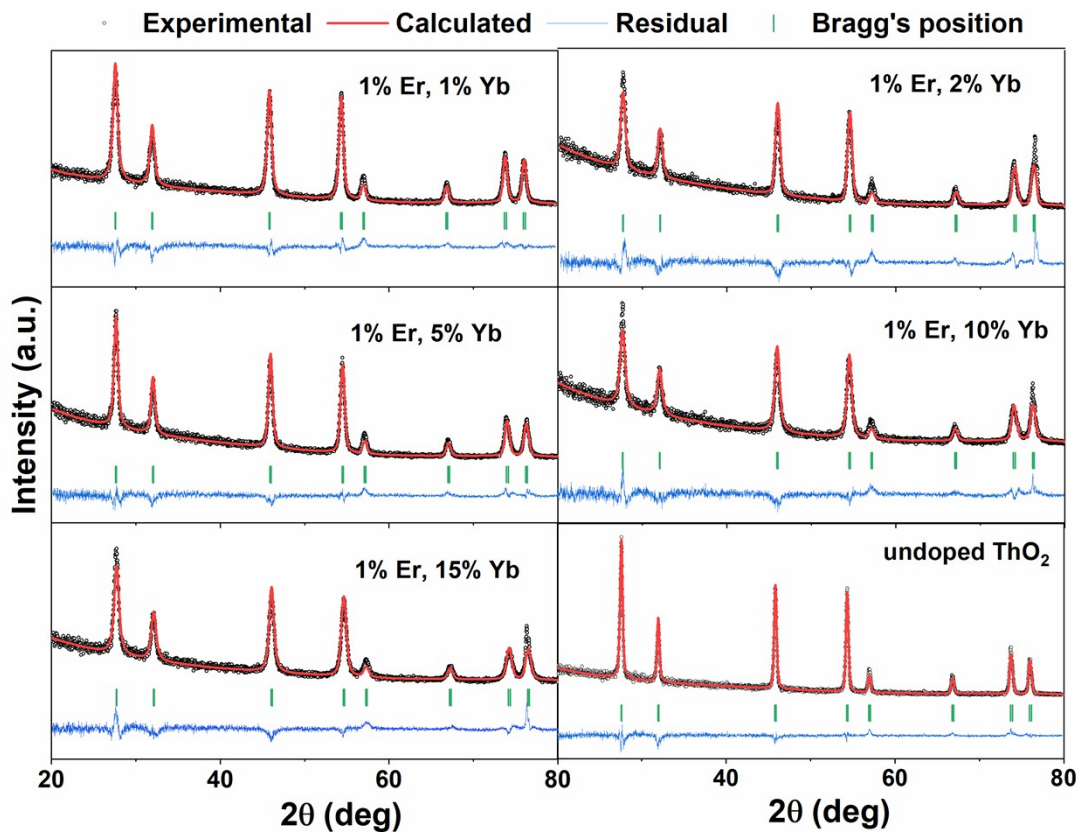

Figure S1. Rietveld refinement of the XRD spectra of ThO<sub>2</sub>:1%Er<sup>3+</sup>,x%Yb<sup>3+</sup> Nanophosphor (x=1, 2, 5, 10 and 15)

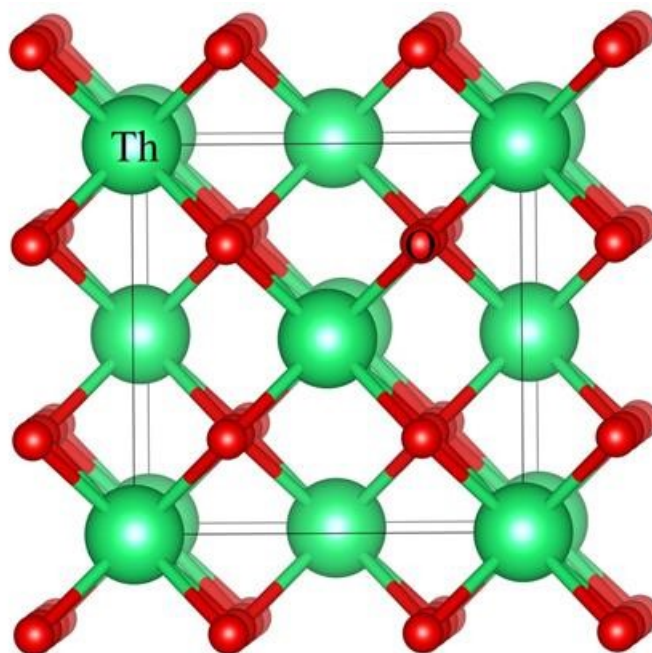

Figure S2. Crystal structure of ThO<sub>2</sub>.

Table S1. Parameters from Rietveld refinement of the XRD patterns of ThO<sub>2</sub>:1%Er<sup>3+</sup>, x%Yb<sup>3+</sup> Nanophosphor (x=1, 3, 5, 10 and 15)

| Sample                           | Fit Parameters                                                                              | Lattice Parameters (Å) | Lattice Volume (Å <sup>3</sup> ) |
|----------------------------------|---------------------------------------------------------------------------------------------|------------------------|----------------------------------|
| Undoped ThO <sub>2</sub>         | R <sub>p</sub> = 4.94 ; R <sub>wp</sub> = 6.14<br>R <sub>exp</sub> = 3.98 ; $\chi^2$ = 2.38 | 5.5984(1)              | 175.46(1)                        |
| ThO <sub>2</sub> : 1% Er, 1% Yb  | R <sub>p</sub> = 4.75; R <sub>wp</sub> = 5.89<br>R <sub>exp</sub> = 3.68; $\chi^2$ = 2.57   | 5.5990(1)              | 175.52(1)                        |
| ThO <sub>2</sub> : 1% Er, 2% Yb  | R <sub>p</sub> = 5.80 ; R <sub>wp</sub> = 8.76<br>R <sub>exp</sub> = 4.09 ; $\chi^2$ = 4.59 | 5.5765(6)              | 173.41(2)                        |
| ThO <sub>2</sub> : 1% Er, 5% Yb  | R <sub>p</sub> = 4.49; R <sub>wp</sub> = 5.70<br>R <sub>exp</sub> = 3.89 ; $\chi^2$ = 2.15  | 5.5837(1)              | 174.09(1)                        |
| ThO <sub>2</sub> : 1% Er, 10% Yb | R <sub>p</sub> = 5.53; R <sub>wp</sub> = 7.22<br>R <sub>exp</sub> = 4.72; $\chi^2$ = 2.34   | 5.5824(2)              | 173.96(1)                        |
| ThO <sub>2</sub> : 1% Er, 15% Yb | R <sub>p</sub> = 5.20 ; R <sub>wp</sub> = 7.28<br>R <sub>exp</sub> = 4.08 ; $\chi^2$ = 3.18 | 5.5691(2)              | 172.72(1)                        |

**Table S2: Color coordinates values extracted from corrected UC emission spectra of  $\text{ThO}_2:1\%\text{Er}^{3+}, x\%\text{Yb}^{3+}$ nanophosphor( $x=1, 3,5,10$  and  $15$ ).**

| Sample                                     | x       | y       |
|--------------------------------------------|---------|---------|
| $\text{ThO}_2-1\%\text{Er}, 1\%\text{Yb}$  | 0.28034 | 0.70107 |
| $\text{ThO}_2-1\%\text{Er}, 2\%\text{Yb}$  | 0.27558 | 0.70495 |
| $\text{ThO}_2-1\%\text{Er}, 5\%\text{Yb}$  | 0.28373 | 0.69228 |
| $\text{ThO}_2-1\%\text{Er}, 10\%\text{Yb}$ | 0.32902 | 0.64789 |
| $\text{ThO}_2-1\%\text{Er}, 15\%\text{Yb}$ | 0.44734 | 0.53602 |

**Table S3: UCL lifetime values extracted from corrected decay curve after bi-exponential fitting of  $\text{ThO}_2:1\%\text{Er}^{3+}, x\%\text{Yb}^{3+}$ Nanophosphor ( $x=1, 3,5,10$  and  $15$ ).**

| Sample                                 | $T_1(\mu\text{s})$ | $T_2(\mu\text{s})$ | Population of $T_1$ (%) | Population of $T_2$ (%) |
|----------------------------------------|--------------------|--------------------|-------------------------|-------------------------|
| $\text{ThO}_2-1\text{Er}, 1\text{Yb}$  | 236.9              | 514.7              | 54.75                   | 45.25                   |
| $\text{ThO}_2-1\text{Er}, 2\text{Yb}$  | 247.2              | 523.7              | 44.41                   | 55.59                   |
| $\text{ThO}_2-1\text{Er}, 5\text{Yb}$  | 46.7               | 232.3              | 47.14                   | 52.86                   |
| $\text{ThO}_2-1\text{Er}, 10\text{Yb}$ | 24.5               | 107.1              | 67.96                   | 32.04                   |
| $\text{ThO}_2-1\text{Er}, 15\text{Yb}$ | 23.3               | 57.8               | 64.19                   | 35.81                   |

### S3. References

1. Blöchl, P. E., Projector augmented-wave method. *Physical Review B* **1994**, 50, (24), 17953.
2. Kresse, G.; Joubert, D., From ultrasoft pseudopotentials to the projector augmented-wave method. *Physical Review B* **1999**, 59, (3), 1758.
3. Perdew, J. P.; Burke, K.; Ernzerhof, M., Generalized gradient approximation made simple. *Physical review letters* **1996**, 77, (18), 3865.
4. Monkhorst, H. J.; Pack, J. D., Special points for Brillouin-zone integrations. *Physical Review B* **1976**, 13, (12), 5188.
5. Paier, J.; Marsman, M.; Hummer, K.; Kresse, G.; Gerber, I. C.; Ángyán, J. G., Screened hybrid density functionals applied to solids. *The Journal of chemical physics* **2006**, 124, (15), 154709.
6. Togo, A.; Oba, F.; Tanaka, I., First-principles calculations of the ferroelastic transition between rutile-type and  $\text{CaCl}_2$ -type  $\text{SiO}_2$  at high pressures. *Physical Review B* **2008**, 78, (13), 134106.
